# Supplementary material for: Toward robust quantification of dopamine and serotonin in mixtures using nano-graphitic carbon sensors
Source: Royal Society of Chemistry journal article supplement (doi:10.1039/d3an02086j), 2024-01-01
Supplement: d3an02086j2.pdf [file d3an02086j2.pdf]

## Supplementary Information

### Toward robust quantification of dopamine and serotonin in mixtures using nano-graphitic carbon sensors

Moeid Jamalzadeh, Edoardo Cuniberto, Zhujun Huang, Ryan M. Feeley, Jyoti C. Patel, Margaret E. Rice, Joline Uichanco, Davood Shahrjerdi

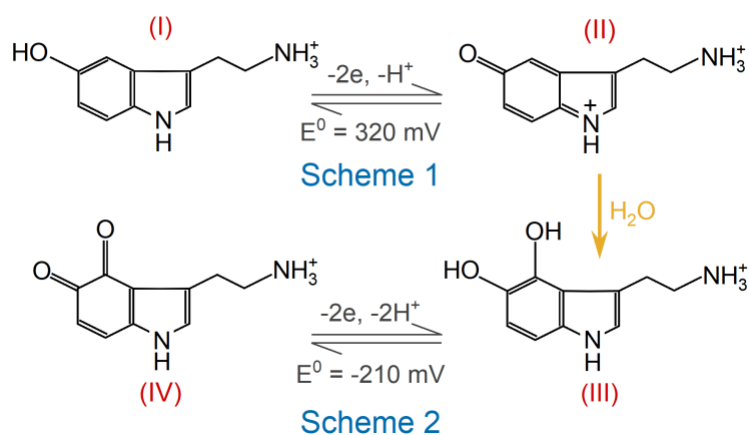

**Fig. S1:** The electrochemical pathway of 5-HT oxidation, illustrating the primary and secondary reactions.

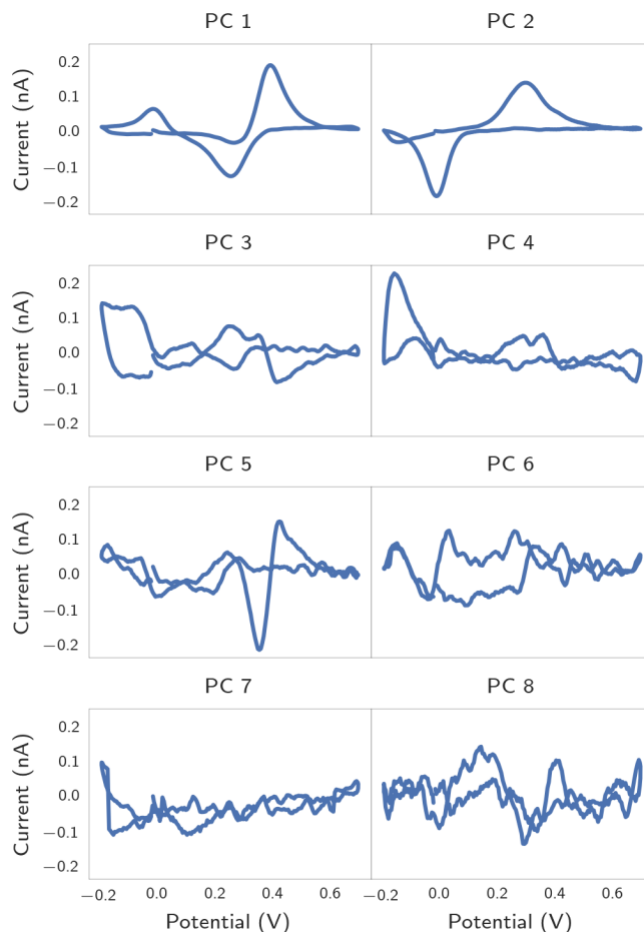

**Fig. S2:** Top eight principal components (PCs) estimated from a training set of voltammograms collected from an NG sensor with the engineered N-shape waveform in a solution where [DA] and [5-HT] is varied. The first few PCs correspond to variations in voltammograms that correspond to the dynamics in analyte concentrations. The last few PCs correspond to data noise.

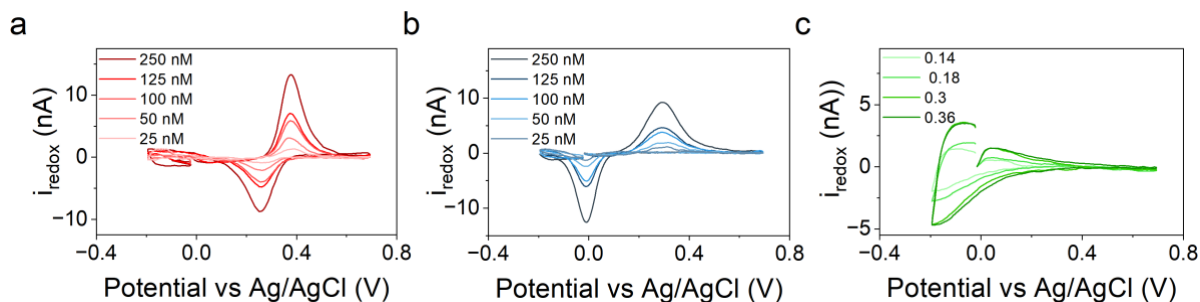

**Fig. S3:** Sample of voltammograms of a) 5-HT, b) DA, and c)  $\Delta p\text{H}$  from 7.4 from sensor NG-A.

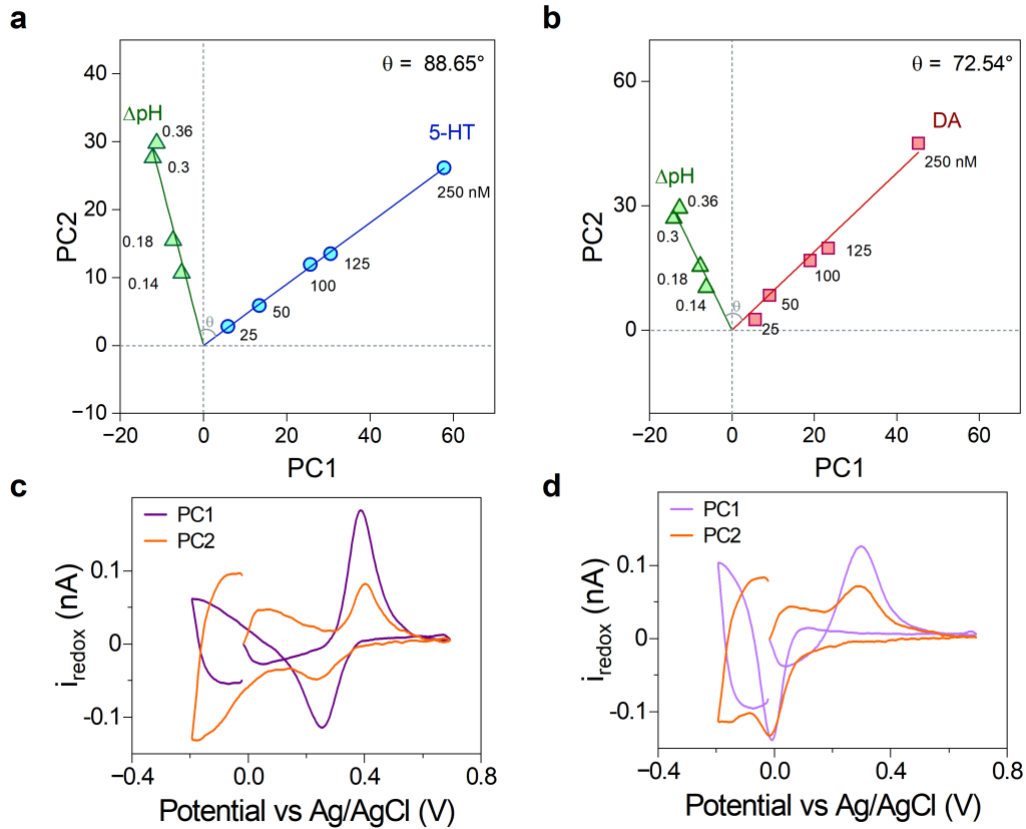

**Fig. S4:** Score plots for CVs collected from an NG sensor with the engineered N-shape waveform, where the training set consists of (a) CVs of DA and  $\Delta\text{pH}$  only, (c) CVs of 5-HT and  $\Delta\text{pH}$  only. The scores of (a) and (c) are computed from the first two principal components (PC1 and PC2) of the training data which are shown in (b) and (d), respectively. The near-orthogonal angles between the score vectors ( $72.54$  and  $88.65$ ) indicate the ability of NG sensors to distinguish among DA, 5-HT and  $\Delta\text{pH}$ .

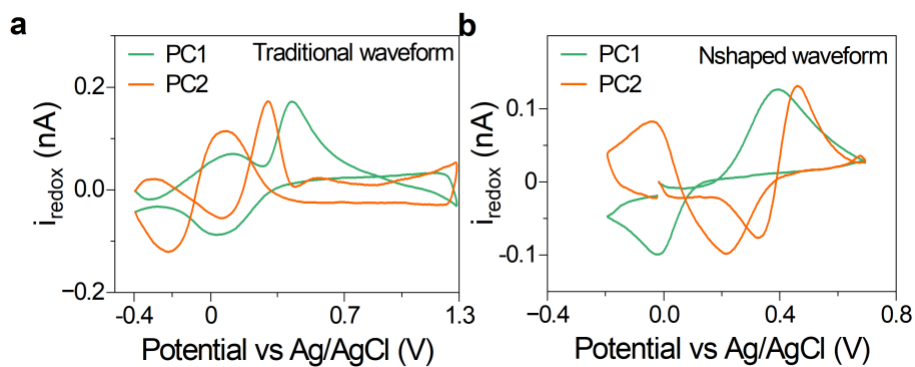

**Fig. S5:** (a) First two principal components of FSCV data collected from CF with a traditional triangular waveform. (b) First two principal components of FSCV data collected from CF with the engineered N-shape waveform.

**Table S1:** Concentrations of DA and 5-HT used in the experiments described in Sections 2.4-2.5

| Solution | [DA] (nM) | [5-HT] (nM) |
|----------|-----------|-------------|
| Pure     | 25        | 0           |
| Pure     | 50        | 0           |
| Pure     | 100       | 0           |
| Pure     | 125       | 0           |
| Pure     | 0         | 25          |
| Pure     | 0         | 50          |
| Pure     | 0         | 100         |
| Pure     | 0         | 125         |
| Mix      | 25        | 25          |
| Mix      | 25        | 50          |
| Mix      | 25        | 100         |
| Mix      | 50        | 25          |
| Mix      | 50        | 50          |
| Mix      | 50        | 100         |
| Mix      | 100       | 25          |
| Mix      | 100       | 50          |
| Mix      | 100       | 100         |

**Table S2:** Prediction accuracy on same-sensor (NG-A) test data of a PCR model (num. PCs=3) trained from CVs of an NG sensor (NG-A) with the engineered N-shape waveform

| Solution       | [DA] (nM) | [5-HT] (nM) | Num. samples | Mean absolute error (nM) |            | Mean absolute percentage error |           |
|----------------|-----------|-------------|--------------|--------------------------|------------|--------------------------------|-----------|
|                |           |             |              | DA                       | 5-HT       | DA                             | 5-HT      |
| Pure           | 25        | 0           | 6            | 1.4                      | 3.1        | 6%                             | -         |
| Pure           | 50        | 0           | 10           | 6.4                      | 1.3        | 13%                            | -         |
| Pure           | 100       | 0           | 15           | 4.9                      | 1.0        | 5%                             | -         |
| Pure           | 125       | 0           | 16           | 4.1                      | 0.4        | 3%                             | -         |
| Pure           | 0         | 25          | 5            | 2.4                      | 3.0        | -                              | 12%       |
| Pure           | 0         | 50          | 7            | 3.2                      | 4.0        | -                              | 8%        |
| Pure           | 0         | 100         | 10           | 2.1                      | 8.4        | -                              | 8%        |
| Pure           | 0         | 125         | 10           | 2.1                      | 4.0        | -                              | 3%        |
| Mix            | 25        | 25          | 7            | 0.6                      | 0.7        | 2%                             | 3%        |
| Mix            | 25        | 50          | 6            | 0.4                      | 2.6        | 2%                             | 5%        |
| Mix            | 25        | 100         | 7            | 2.8                      | 2.5        | 11%                            | 3%        |
| Mix            | 50        | 25          | 9            | 3.7                      | 0.8        | 7%                             | 3%        |
| Mix            | 50        | 50          | 10           | 1.2                      | 1.2        | 2%                             | 2%        |
| Mix            | 50        | 100         | 7            | 6.6                      | 2.0        | 13%                            | 2%        |
| Mix            | 100       | 25          | 11           | 2.4                      | 3.9        | 2%                             | 16%       |
| Mix            | 100       | 50          | 8            | 3.9                      | 1.8        | 4%                             | 4%        |
| Mix            | 100       | 100         | 8            | 3.7                      | 5.1        | 4%                             | 5%        |
| <b>Average</b> |           |             |              | <b>3.0</b>               | <b>2.7</b> | <b>6%</b>                      | <b>6%</b> |

**Table S3:** Prediction accuracy on same-sensor (NG-A) test data of a two-parameter model trained from CVs of an NG sensor (NG-A) with the engineered N-shape waveform

| Solution       | [DA]<br>(nM) | [5-HT]<br>(nM) | Num.<br>samples | Mean absolute error<br>(nM) |            | Mean absolute<br>percentage error |           |
|----------------|--------------|----------------|-----------------|-----------------------------|------------|-----------------------------------|-----------|
|                |              |                |                 | DA                          | 5-HT       | DA                                | 5-HT      |
| Pure           | 25           | 0              | 6               | 4.8                         | 2.3        | 19%                               | -         |
| Pure           | 50           | 0              | 10              | 6.5                         | 5.2        | 13%                               | -         |
| Pure           | 100          | 0              | 15              | 6.6                         | 2.5        | 7%                                | -         |
| Pure           | 125          | 0              | 16              | 3.3                         | 4.6        | 3%                                | -         |
| Pure           | 0            | 25             | 5               | 10.1                        | 4.4        | -                                 | 17%       |
| Pure           | 0            | 50             | 7               | 5.6                         | 4.9        | -                                 | 10%       |
| Pure           | 0            | 100            | 10              | 2.9                         | 13.3       | -                                 | 13%       |
| Pure           | 0            | 125            | 10              | 8.3                         | 2.5        | -                                 | 2%        |
| Mix            | 25           | 25             | 7               | 6.1                         | 6.4        | 25%                               | 25%       |
| Mix            | 25           | 50             | 6               | 2.4                         | 6.9        | 10%                               | 14%       |
| Mix            | 25           | 100            | 7               | 2.4                         | 7.8        | 10%                               | 8%        |
| Mix            | 50           | 25             | 9               | 1.5                         | 1.8        | 3%                                | 7%        |
| Mix            | 50           | 50             | 10              | 1.0                         | 2.0        | 2%                                | 4%        |
| Mix            | 50           | 100            | 7               | 8.2                         | 2.0        | 16%                               | 2%        |
| Mix            | 100          | 25             | 11              | 3.5                         | 2.5        | 3%                                | 10%       |
| Mix            | 100          | 50             | 8               | 6.5                         | 1.6        | 6%                                | 3%        |
| Mix            | 100          | 100            | 8               | 5.1                         | 5.2        | 5%                                | 5%        |
| <b>Average</b> |              |                |                 | <b>5.0</b>                  | <b>4.5</b> | <b>9%</b>                         | <b>9%</b> |

**Table S4:** Prediction accuracy on cross-sensor (NG-B) test data of a PCR model (num. PCs=3) trained from CVs of an NG sensor (NG-A) with the engineered N-shape waveform

| Solution       | [DA]<br>(nM) | [5-HT]<br>(nM) | Num.<br>samples | Mean absolute error<br>(nM) |            | Mean absolute<br>percentage error |           |
|----------------|--------------|----------------|-----------------|-----------------------------|------------|-----------------------------------|-----------|
|                |              |                |                 | DA                          | 5-HT       | DA                                | 5-HT      |
| Pure           | 25           | 0              | 7               | 2.0                         | 0.5        | 8%                                | -         |
| Pure           | 50           | 0              | 10              | 11.6                        | 1.4        | 23%                               | -         |
| Pure           | 100          | 0              | 19              | 6.4                         | 0.3        | 6%                                | -         |
| Pure           | 125          | 0              | 16              | 9.8                         | 2.6        | 6%                                | -         |
| Pure           | 0            | 25             | 5               | 2.6                         | 2.3        | -                                 | 9%        |
| Pure           | 0            | 50             | 7               | 3.3                         | 4.3        | -                                 | 9%        |
| Pure           | 0            | 100            | 10              | 3.3                         | 8.7        | -                                 | 9%        |
| Pure           | 0            | 125            | 10              | 1.6                         | 6.3        | -                                 | 5%        |
| Mix            | 25           | 25             | 7               | 0.4                         | 3.1        | 2%                                | 12%       |
| Mix            | 25           | 50             | 6               | 0.4                         | 5.9        | 1%                                | 12%       |
| Mix            | 25           | 100            | 7               | 1.7                         | 4.9        | 7%                                | 5%        |
| Mix            | 50           | 25             | 9               | 2.6                         | 3.2        | 5%                                | 13%       |
| Mix            | 50           | 50             | 10              | 1.7                         | 2.1        | 3%                                | 4%        |
| Mix            | 50           | 100            | 7               | 7.9                         | 5.5        | 16%                               | 5%        |
| Mix            | 100          | 25             | 11              | 4.6                         | 2.7        | 5%                                | 11%       |
| Mix            | 100          | 50             | 8               | 8.8                         | 4.1        | 9%                                | 8%        |
| Mix            | 100          | 100            | 8               | 3.3                         | 10.1       | 3%                                | 10%       |
| <b>Average</b> |              |                |                 | <b>4.2</b>                  | <b>4.0</b> | <b>7%</b>                         | <b>9%</b> |

**Table S5:** Prediction accuracy on same-sensor test data of a PCR model (num. PCs=8) trained from CVs of a CF microelectrode with the engineered N-shape waveform

| Solution       | [DA]<br>(nM) | [5-HT]<br>(nM) | Num.<br>samples | Mean absolute error<br>(nM) |              | Mean absolute<br>percentage error |            |
|----------------|--------------|----------------|-----------------|-----------------------------|--------------|-----------------------------------|------------|
|                |              |                |                 | DA                          | 5-HT         | DA                                | 5-HT       |
| Pure           | 250          | 0              | 15              | 54.4                        | 80.6         | 22%                               | -          |
| Pure           | 500          | 0              | 15              | 68.9                        | 45.2         | 14%                               | -          |
| Pure           | 1000         | 0              | 20              | 62.9                        | 68.3         | 6%                                | -          |
| Pure           | 2000         | 0              | 19              | 64.5                        | 53.0         | 3%                                | -          |
| Pure           | 0            | 100            | 20              | 43.4                        | 56.9         | -                                 | 57%        |
| Pure           | 0            | 200            | 10              | 11.6                        | 58.0         | -                                 | 29%        |
| Pure           | 0            | 500            | 20              | 51.1                        | 82.5         | -                                 | 16%        |
| Pure           | 0            | 1000           | 20              | 57.7                        | 99.7         | -                                 | 10%        |
| Pure           | 0            | 1500           | 10              | 86.5                        | 410.3        | -                                 | 27%        |
| <b>Average</b> |              |                |                 | <b>55.7</b>                 | <b>106.1</b> | <b>11%</b>                        | <b>28%</b> |
